# Supplementary material for: The value of dual-energy computed tomography (DECT) in the diagnosis of urinary calculi: a systematic review and meta-analysis of retrospective studies
Source: PeerJ. 2023 Oct 2;11:e16076. doi: 10.7717/peerj.16076 (PMC10552745; doi:10.7717/peerj.16076)
Supplement: Data S1 [file peerj-11-16076-s001.xlsx]

## Sheet: Sheet1
Study	Country	Number of patients	CT (kV)	Number of urinary calculi	Study centre
Jepperson et al. (2013)	USA	89	80140	27	Department of Radiology, Mayo Clinic, USA
Elisabeth et al. (2021)	Germany	70	80140	34	Department of Diagnostic and Interventional Radiology, Medical Faculty, University Dusseldorf, Germany
Mehmet et al. (2023)	Turkey	115	100140	83	Department of Radiology, Faculty of Medicine, İnönü University, Malatya, Turkey
Botsikas et al. (2014)	Switzerland	116	80140	23	Radiology Department, Geneva University Hospital, Geneva, Switzerland
Katherine et al. (2022)	Australia	1760	80140	1740	Faculty of Medicine and Health, University of Sydney, Camperdown, Australia
Jung et al. (2016)	Korea	296	80/100,140	148	Department of Radiology, Samsung Medical Center, Sungkyunkwan University School of Medicine, Seoul
Ascenti et al. (2016)	Italy	84	80140	75	Department of Radiological Sciences, University of Messina, Messina, Italy
Chen et al. (2016)	China	171	80140	45	Department of Medical Imaging, Kaohsiung Medical University Hospital, Kaohsiung, Taiwan
Karlo et al. (2013)	Switzerland	100	80140	104	Department of Radiology, University Hospital Zurich, Switzerland
Moon et al. (2014)	Korea	29	100140	62	The Department of Radiology and Centre for Imaging Science, Sungkyunkwan University School of Medicine, Seoul

## Sheet: Sheet1 (2)
	Author	Year	Region	Method	Cases
						tp	fp	fn	tn
	Ascenti	2013	Italy	retrospective	27	16	1	2	8
	Botsikas	2014	Switzerland	retrospective	75	35	2	3	35
	Chen	2016	China	retrospective	23	7	1	1	14
	Elisabeth	2021	Germany	retrospective	45	34	1	1	9
	Jepperson	2013	USA	retrospective	34	25	2	1	6
	Jung	2015	Korea	prospective	148	75	3	4	66
	Karlo	2016	Switzerland	retrospective	104	50	2	2	50
	Katherine	2022	Australia	retrospective	1740	988	109	7	636
	Mehmet	2023	Turkey	prospective	83	36	1	2	44
	Moon	2014	Korea	retrospective	62	33	2	1	25
